# Supplementary material for: A software tool for the quantification of metastatic colony growth dynamics and size distributions in vitro and in vivo
Source: PubMed Central journal article supplement (PMC6307751; doi:10.1371/journal.pone.0209591), 2018-12-27
Supplement: pone.0209591.s010.pdf [file pone.0209591.s010.pdf]

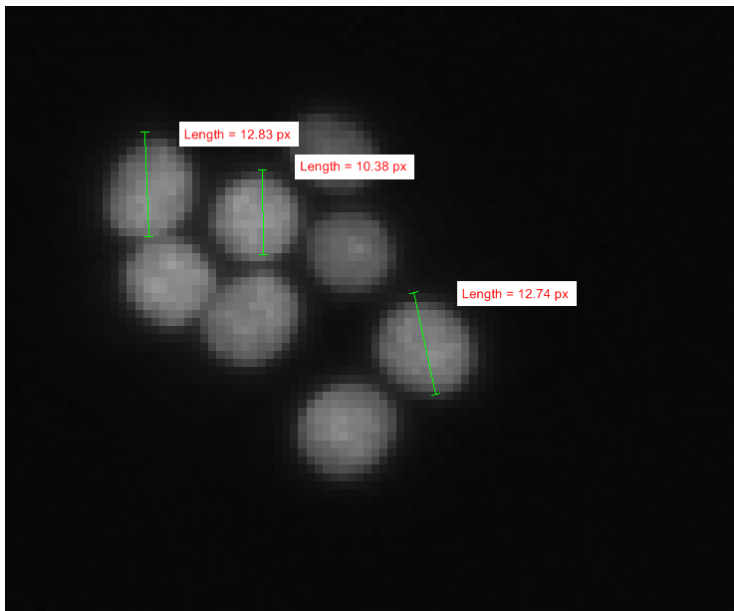

Original Image  
1.346  $\mu\text{m}/\text{px}$   
13346 x 12300 px total

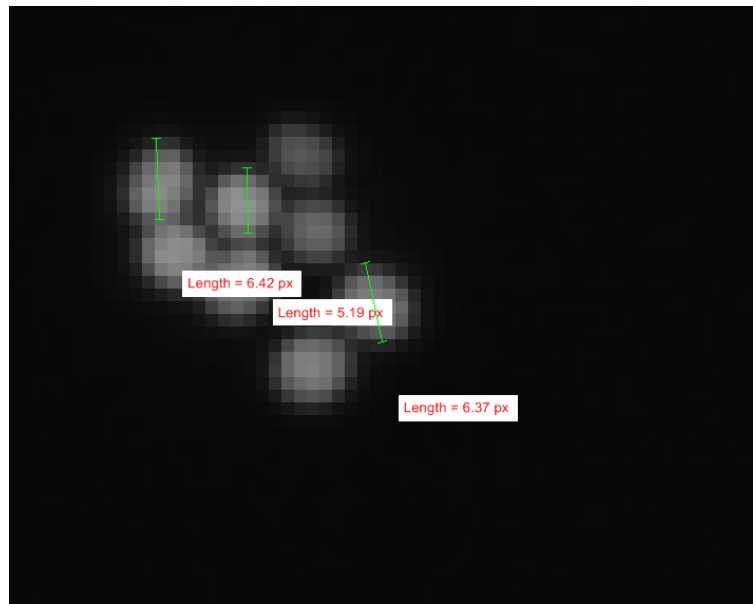

Reduced image used as input to the script  
2.692  $\mu\text{m}/\text{px}$   
Total 6673 x 6150 px
